# Supplementary material for: Individual Variation of Transient Milk Production Loss After Vaccination in Sahiwal Cows (Bos Indicus)
Source: Research Square preprint supplement (doi:10.21203/rs.3.rs-2467219/v1), 2023-02-15
Supplement: Supplementary file 1 [file 6a8738f861b83723f12debd6.docx]

**Table 1:- Date of vaccination and Sahiwal cows were in milk during vaccination**

| **Name of the vaccine** | **Date of vaccination** | **Number (n) of Sahiwal cows in milk during vaccination** | **Total Sahiwal cows in milk during vaccination** |
| --- | --- | --- | --- |
| FMD | 4/3/2018 (1st)  7/10/2018 (2nd)  10/4/2019 (1st)  26/10/2019 (2nd)  31/3/2020 (1st)  21/10/2020 (2nd) | 65  74  45  63  76  47 | 370 |
| HS+BQ | 3/5/2018  25/7/2019  19/5/2020 | 65  67  73 | 205 |
| THEILERIOSIS | 1/7/2019  24/8/2020 | 71  67 | 138 |
| IBR | 27/8/2019 | 62 | 62 |
